# Supplementary material for: A new hERG allosteric modulator rescues genetic and drug‐induced long‐QT syndrome phenotypes in cardiomyocytes from isogenic pairs of patient induced pluripotent stem cells
Source: PubMed Central journal article supplement (PMC5009811; doi:10.15252/emmm.201606260), 2016-07-28
Supplement: EMMM-8-1065-s001.pdf [file EMMM-8-1065-s001.pdf]

# Appendix Figures

## **A new hERG allosteric modulator rescues genetic and drug-induced Long-QT Syndrome phenotypes in cardiomyocytes from isogenic pairs of patient induced pluripotent stem cells**

Luca Sala, Zhiyi Yu, Dorien Ward-van Oostwaard, Jacobus P.D. van Veldhoven, Alessandra Moretti, Karl-Ludwig Laugwitz, Christine L. Mummery, Adriaan P. IJzerman, Milena Bellin\*

---

### **Table of Contents:**

Appendix Figure S1  
Appendix Figure S2  
Appendix Figure S3  
Appendix Figure S4  
Appendix Table S1  
Appendix Table S2

---

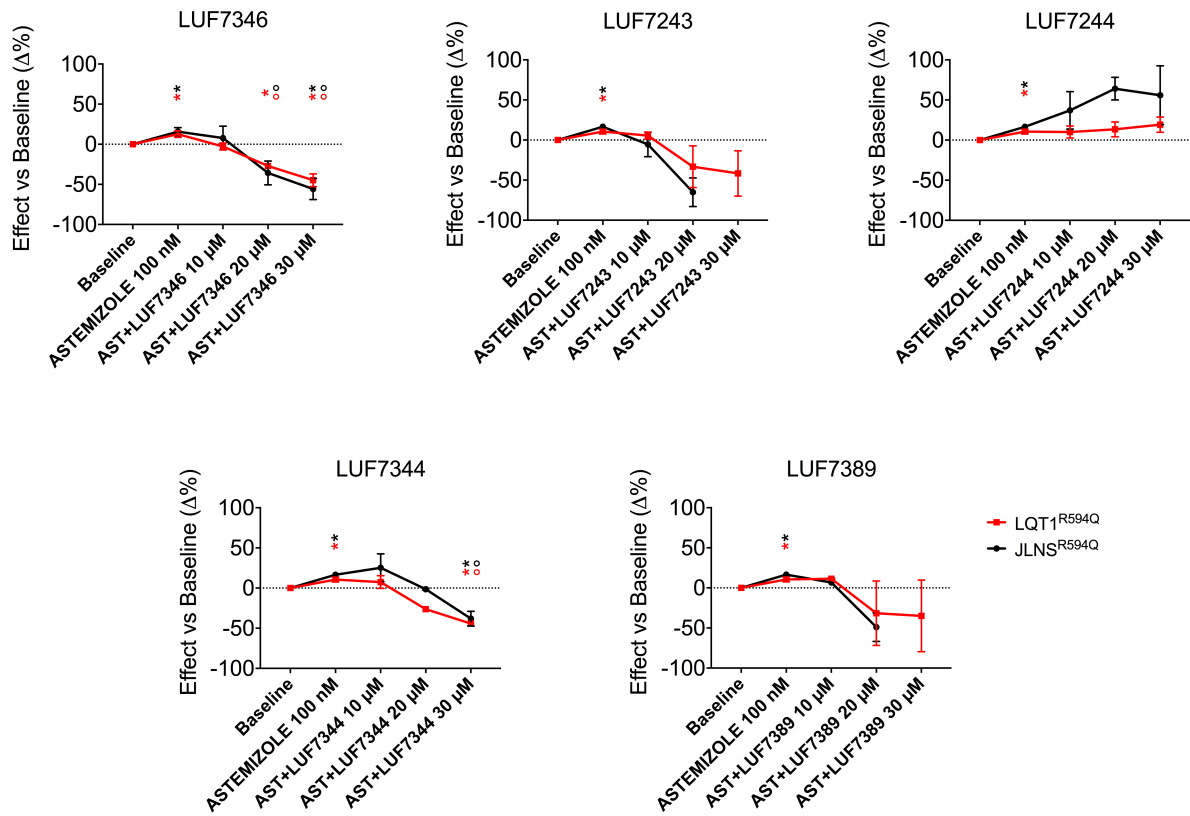

**Appendix Figure S1: Effect of allosteric modulators on QT interval measured in hiPSC-CMs.**

Pilot experiments on MEA displaying the effect of different LUF compounds in drug-induced LQTS. \* =  $p < 0.05$  vs respective baseline. ° =  $p < 0.05$  vs AST. The colour of the symbols indicates the relative statistical significance. N: 3-10.

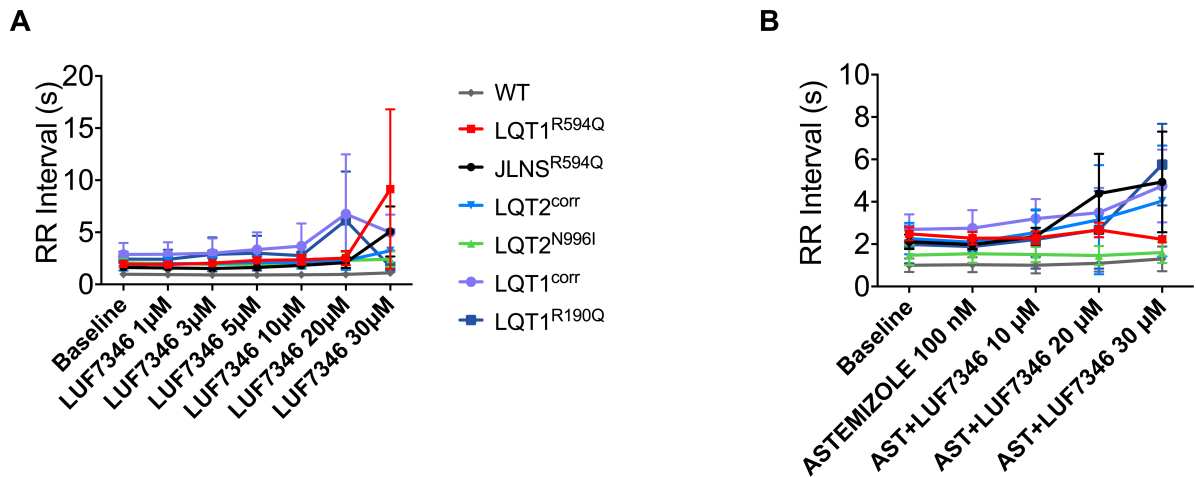

**Appendix Figure S2: LUF7346 does not alter beating frequency on spontaneously beating hiPSC-CMs monolayers.** A) Average effects of increasing concentrations of LUF7346 on the RR interval measured with MEA. N: 14-37. B) Average effects of AST and increasing concentrations of LUF7346 in the presence of AST, on the RR interval measured with MEA. N: 7-14.

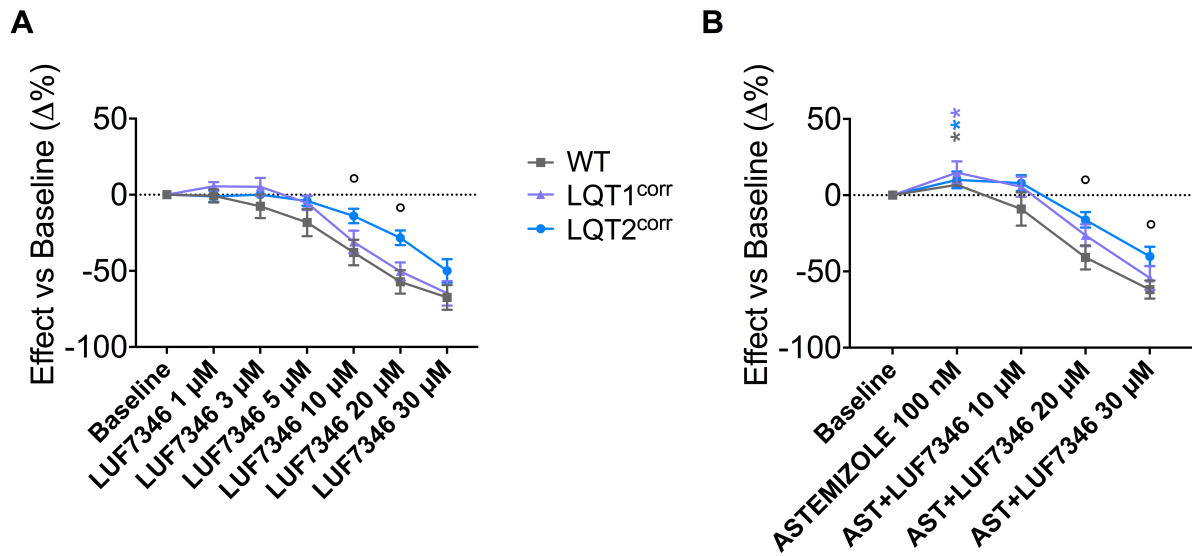

**Appendix Figure S3: Comparison of LUF7346 effect on QT interval of control hiPSC-CMs.** A) Average effects of increasing concentrations of LUF7346 on the QT interval measured with MEA. N: 8-17. ° =  $p < 0.05$  vs WT and LQT1<sup>corr</sup>. B) Average effects of AST and increasing concentrations of LUF7346 in the presence of AST on the QT interval measured with MEA. \* =  $p < 0.05$  vs respective baseline. The colour of the asterisks indicates comparisons and relative statistical significance. ° =  $p < 0.05$  vs WT and LQT1<sup>corr</sup>. N: 6-9.

**A**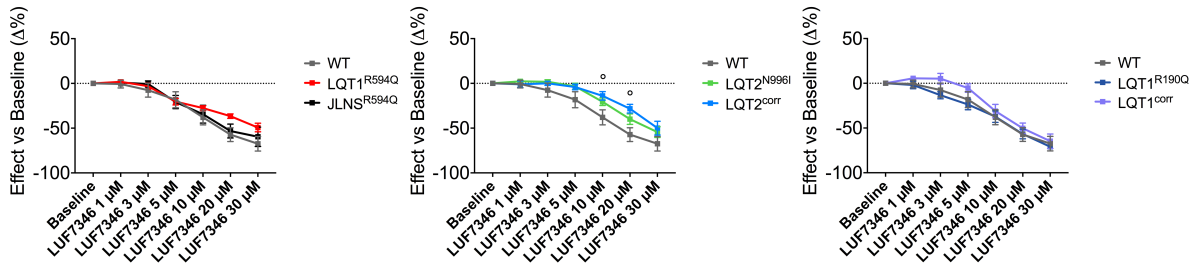**B**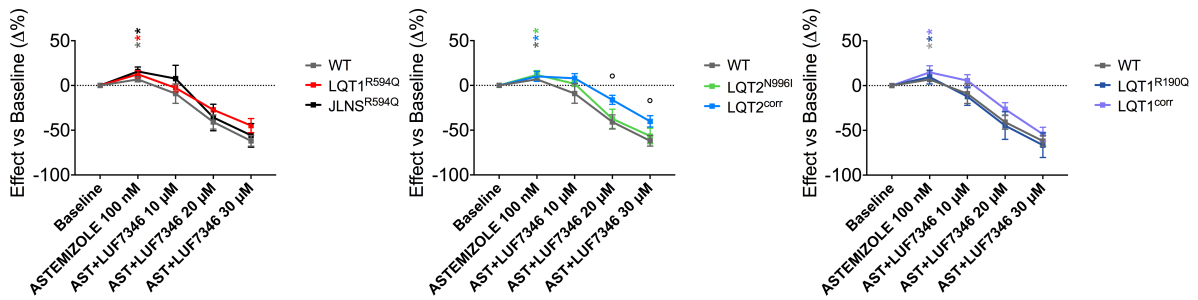

**Appendix Figure S4: Comparison of LUF7346 effect among isogenic hiPSC lines.**

A) Average of the effect of increasing concentrations of LUF7346 on QT interval duration compared to baseline. ° =  $p < 0.05$  vs WT. The colour of the symbols indicates comparisons and relative statistical significance. N: 7-14. B) Average data of the effect of AST and increasing concentrations of LUF7346 in the presence of AST on QT interval durations, compared to baseline. \* =  $p < 0.05$ . The colour of the symbols indicates the relative statistical significance. N: 7-12.

**Appendix Table S1** - The percentage specific binding of [<sup>3</sup>H]dofetilide to the hERG channel after 6 min of dissociation in the absence ( $B_{\text{control}}$ ) or presence of 10 or 50  $\mu\text{M}$  of the indicated compounds (B). Values are means ( $\pm\text{SEM}$ ) of at least three independent experiments performed in duplicate.

| Compounds | %B/ $B_{\text{control}}$ |                  |
|-----------|--------------------------|------------------|
|           | 10 $\mu\text{M}$         | 50 $\mu\text{M}$ |
| Control   | 100                      | 100              |
| +LUF7243  | 71 $\pm$ 2               | 23 $\pm$ 3       |
| +LUF7244  | 43 $\pm$ 2               | 38 $\pm$ 5       |
| +LUF7344  | 47 $\pm$ 2               | 28 $\pm$ 1       |
| +LUF7346  | 44 $\pm$ 1               | 16 $\pm$ 0.01    |
| +LUF7389  | 38 $\pm$ 3               | 26 $\pm$ 3       |
| n         | >3                       | >3               |

**Appendix Table S2-** Parameters from Major-axis regression analysis in all hiPSC-CMs analysed.

| <b>WT</b>                   |                    |                         |                             |
|-----------------------------|--------------------|-------------------------|-----------------------------|
|                             | <b>Uncorrected</b> | <b>Bazett's formula</b> | <b>Fridericia's formula</b> |
| <b>R<sup>2</sup></b>        | 0.2679             | 0.5189                  | 0.4508                      |
| <b>1/slope</b>              | -0.01197           | -0.006264               | -0.007484                   |
| <b>Deviation from 0</b>     | NS                 | *                       | *                           |
| <b>p-value</b>              | 0.1535             | 0.0284                  | 0.0477                      |
| <b>LQT1<sup>R594Q</sup></b> |                    |                         |                             |
|                             | <b>Uncorrected</b> | <b>Bazett's formula</b> | <b>Fridericia's formula</b> |
| <b>R<sup>2</sup></b>        | 0.05125            | 0.279                   | 0.0939                      |
| <b>1/slope</b>              | 0.07485            | -0.04008                | -0.06946                    |
| <b>Deviation from 0</b>     | NS                 | *                       | *                           |
| <b>p-value</b>              | 0.0904             | <0.0001                 | 0.0204                      |
| <b>JLNS<sup>R594Q</sup></b> |                    |                         |                             |
|                             | <b>Uncorrected</b> | <b>Bazett's formula</b> | <b>Fridericia's formula</b> |
| <b>R<sup>2</sup></b>        | 0.3157             | 0.2306                  | 0.1037                      |
| <b>1/slope</b>              | 0.107              | -0.0261                 | -0.03653                    |
| <b>Deviation from 0</b>     | NS                 | *                       | NS                          |
| <b>p-value</b>              | 0.578              | 0.0035                  | 0.0592                      |
| <b>LQT2<sup>corr</sup></b>  |                    |                         |                             |
|                             | <b>Uncorrected</b> | <b>Bazett's formula</b> | <b>Fridericia's formula</b> |
| <b>R<sup>2</sup></b>        | 0.1035             | 0.3587                  | 0.2824                      |
| <b>1/slope</b>              | -0.0265            | -0.01516                | -0.01685                    |
| <b>Deviation from 0</b>     | NS                 | *                       | *                           |
| <b>p-value</b>              | 0.2422             | 0.0183                  | 0.0415                      |
| <b>LQT2<sup>N996I</sup></b> |                    |                         |                             |
|                             | <b>Uncorrected</b> | <b>Bazett's formula</b> | <b>Fridericia's formula</b> |
| <b>R<sup>2</sup></b>        | 0.001487           | 0.1312                  | 0.06852                     |
| <b>1/slope</b>              | -0.1356            | -0.01798                | -0.02317                    |
| <b>Deviation from 0</b>     | NS                 | NS                      | NS                          |
| <b>p-value</b>              | 0.8613             | 0.082                   | 0.2166                      |
| <b>LQT1<sup>corr</sup></b>  |                    |                         |                             |

|                             | <b>Uncorrected</b> | <b>Bazett's formula</b> | <b>Fridericia's formula</b> |
|-----------------------------|--------------------|-------------------------|-----------------------------|
| <b>R<sup>2</sup></b>        | 0.04683            | 0.004937                | 0.01185                     |
| <b>1/slope</b>              | -0.01909           | -0.102                  | 0.1919                      |
| <b>Deviation from 0</b>     | NS                 | NS                      | NS                          |
| <b>p-value</b>              | 0.4574             | 0.8113                  | 0.9151                      |
| <b>LQT1<sup>R190Q</sup></b> |                    |                         |                             |
|                             | <b>Uncorrected</b> | <b>Bazett's formula</b> | <b>Fridericia's formula</b> |
| <b>R<sup>2</sup></b>        | 0.2733             | 0.01581                 | 0.1194                      |
| <b>1/slope</b>              | 0.004213           | 0.05819                 | 0.009301                    |
| <b>Deviation from 0</b>     | NS                 | NS                      | NS                          |
| <b>p-value</b>              | 0.099              | 0.4749                  | 0.2979                      |
